# Supplementary material
Source: PubMed Central journal article supplement (PMC10496946)
Supplement: vdad102_suppl_supplementary_figures.pdf [file vdad102_suppl_supplementary_figures.pdf]

## **Supplementary Figures**

### **Combined inhibition of TOP1 and PARP: a synergistic therapeutic strategy for PTEN-deficient glioblastoma**

Olga Kim<sup>1</sup>, Madison Butler<sup>1</sup>, Zach Sergi<sup>1</sup>, Robert W. Robey<sup>2</sup>, Meili Zhang<sup>1</sup>, Raj Chari<sup>3</sup>, Ying Pang<sup>1</sup>, Guangyang Yu<sup>1</sup>, Wei Zhang<sup>1</sup>, Hua Song<sup>1</sup>, Dionne Davis<sup>1</sup>, Robert G. Hawley<sup>4</sup>, Xinyu Wen<sup>4</sup>, Herui Wang<sup>1</sup>, Martha Quezado<sup>5</sup>, Bao Tran<sup>6</sup>, Mythili Merchant<sup>1</sup>, Alice Ranjan<sup>1</sup>, Frank B. Furnari<sup>7</sup>, Javed Khan<sup>4</sup>, Mark R. Gilbert<sup>1</sup>, C. Ryan Miller<sup>8</sup>, Michael M. Gottesman<sup>2</sup>, Yves Pommier<sup>9</sup>, Jing Wu<sup>1\*</sup>

**Figure S1**

**A.**

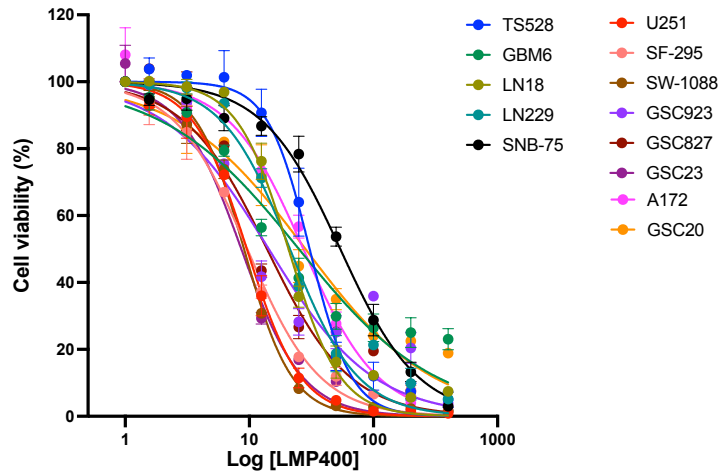

**B.**

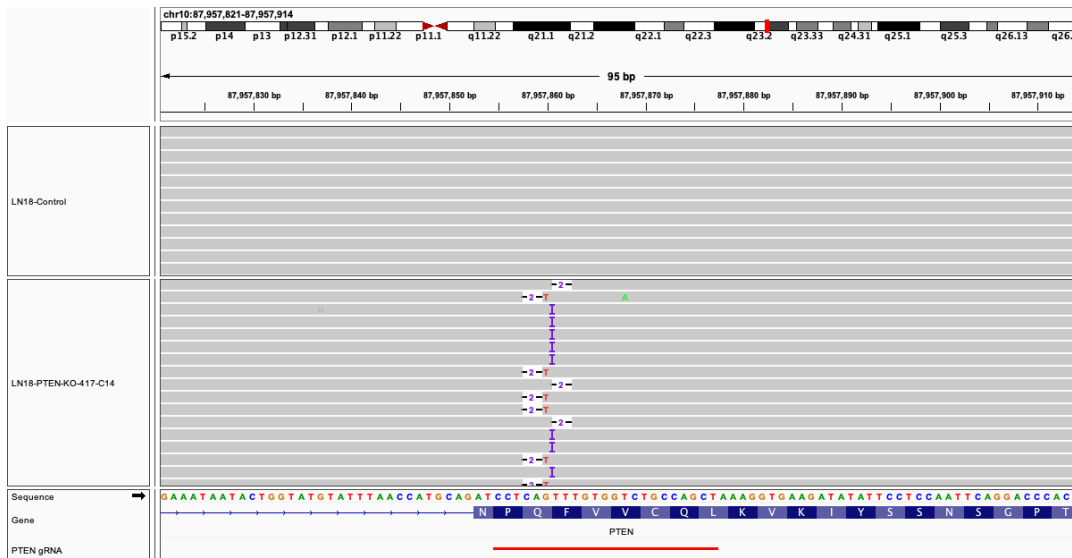

C.

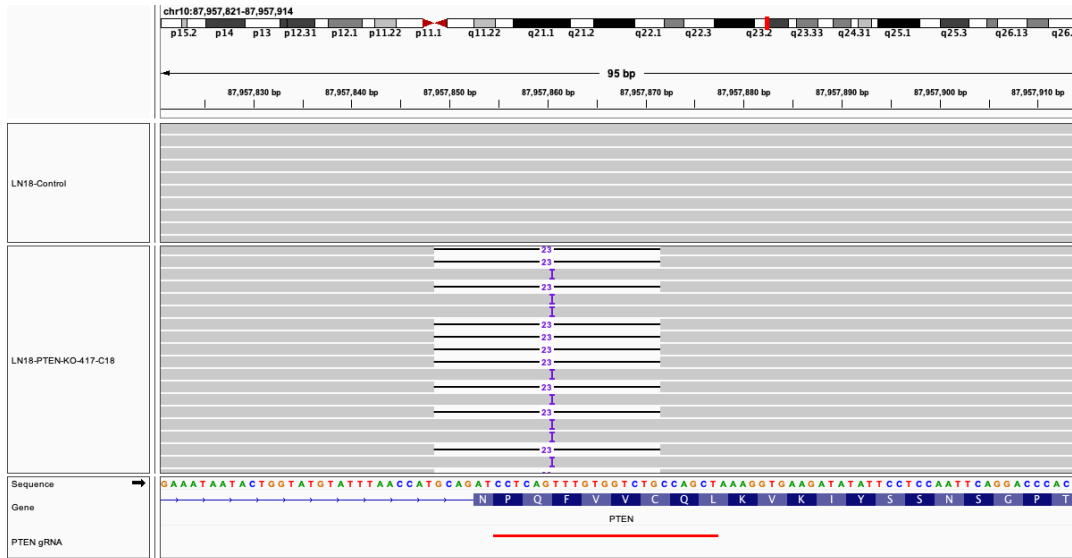

**Figure S1. A.** Dose response curves for LMP400 in each cell line.

Illumina deep sequencing of *PTEN* KO single clones #1 in **B** and #2 in **C** in LN18 compared to LN18-Control cells.

## Figure S2

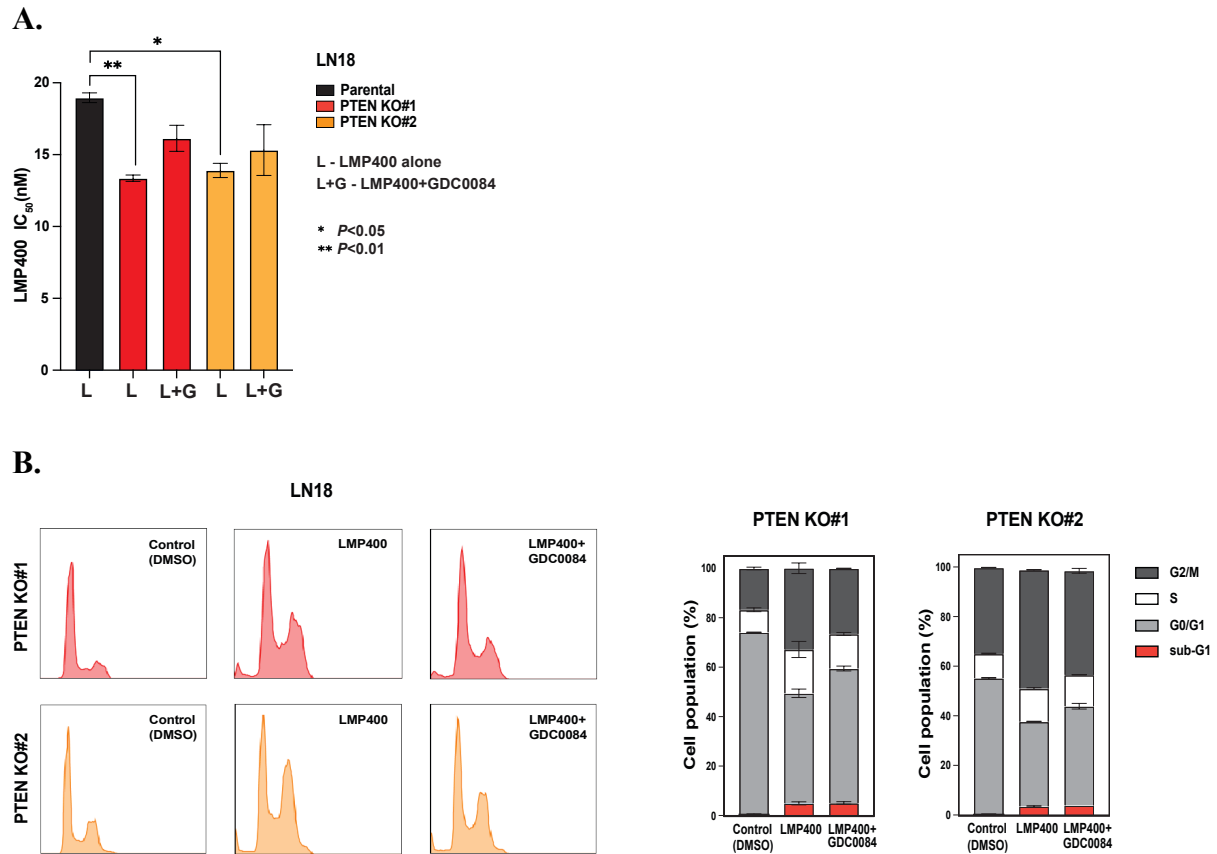

**Figure S2. A.** IC<sub>50</sub> of LMP400 with or without addition of GDC0084 (70 nM) in PTEN KO clones at 72 hours of treatment. **B.** Cell cycle analysis in PTEN KO clones treated with LMP400 (20 nM) + GDC0084 (70 nM) compared to those treated with LMP400 (20 nM) alone for 72 hours. A two-tailed t test was used to evaluate a difference between experimental groups.

\* $p < 0.05$ ; \*\* $p < 0.01$ .

**Figure S3**

| <b>U251</b> |               |          |
|-------------|---------------|----------|
| LMP400 (nM) | Olaparib (uM) | CI Value |
| 3           | 0.3           | 0.56293  |
| 10          | 1             | 0.41525  |
| 30          | 3             | 0.48164  |
| 100         | 10            | 0.89122  |
| 300         | 30            | 1.05498  |

| <b>GSC923</b> |               |          |
|---------------|---------------|----------|
| LMP400 (nM)   | Olaparib (uM) | CI Value |
| 3             | 0.3           | 1.05784  |
| 10            | 1             | 0.15275  |
| 30            | 3             | 0.25407  |
| 300           | 30            | 1.02824  |
| 3000          | 300           | 0.66725  |

| <b>GSC827</b> |               |          |
|---------------|---------------|----------|
| LMP400 (nM)   | Olaparib (uM) | CI Value |
| 3             | 0.3           | 0.98473  |
| 10            | 1             | 0.05398  |
| 30            | 3             | 0.14984  |
| 300           | 30            | 1.21691  |
| 1000          | 100           | 0.71731  |

  

| <b>SW-1088</b> |                |          |
|----------------|----------------|----------|
| LMP400 (nM)    | Niraparib (uM) | CI Value |
| 3.13           | 0.156          | 0.53631  |
| 12.5           | 0.625          | 0.11531  |
| 25             | 1.25           | 0.0917   |
| 50             | 2.5            | 0.08334  |
| 200            | 10             | 0.08222  |

| <b>TR</b>   |                |          |
|-------------|----------------|----------|
| LMP400 (nM) | Niraparib (uM) | CI Value |
| 3.13        | 0.156          | 1.03965  |
| 12.5        | 0.625          | 1.04629  |
| 25          | 1.25           | 0.52516  |
| 50          | 2.5            | 0.3597   |
| 200         | 10             | 0.43237  |

| <b>TRP</b>  |                |          |
|-------------|----------------|----------|
| LMP400 (nM) | Niraparib (uM) | CI Value |
| 3.13        | 0.156          | 0.38863  |
| 12.5        | 0.625          | 0.27392  |
| 25          | 1.25           | 0.54173  |
| 50          | 2.5            | 0.51374  |
| 200         | 10             | 0.74167  |

**Figure S3.** CI values in each cell line calculated using Compusyn software at 72 hours post-treatment.

**Figure S4.**

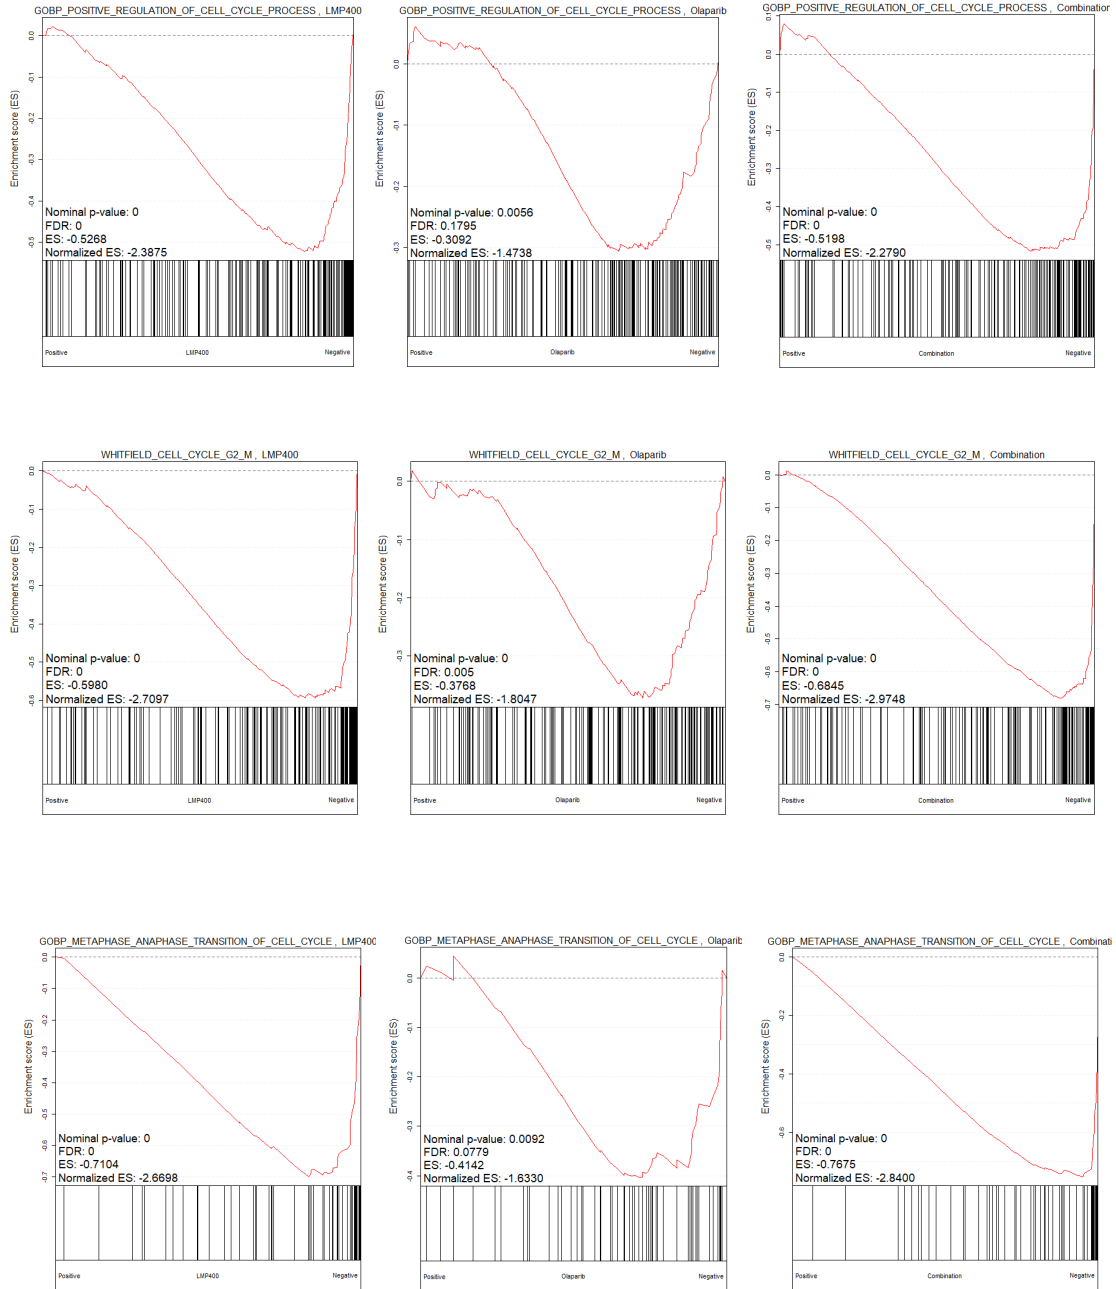

**Figure S4 (continue)**

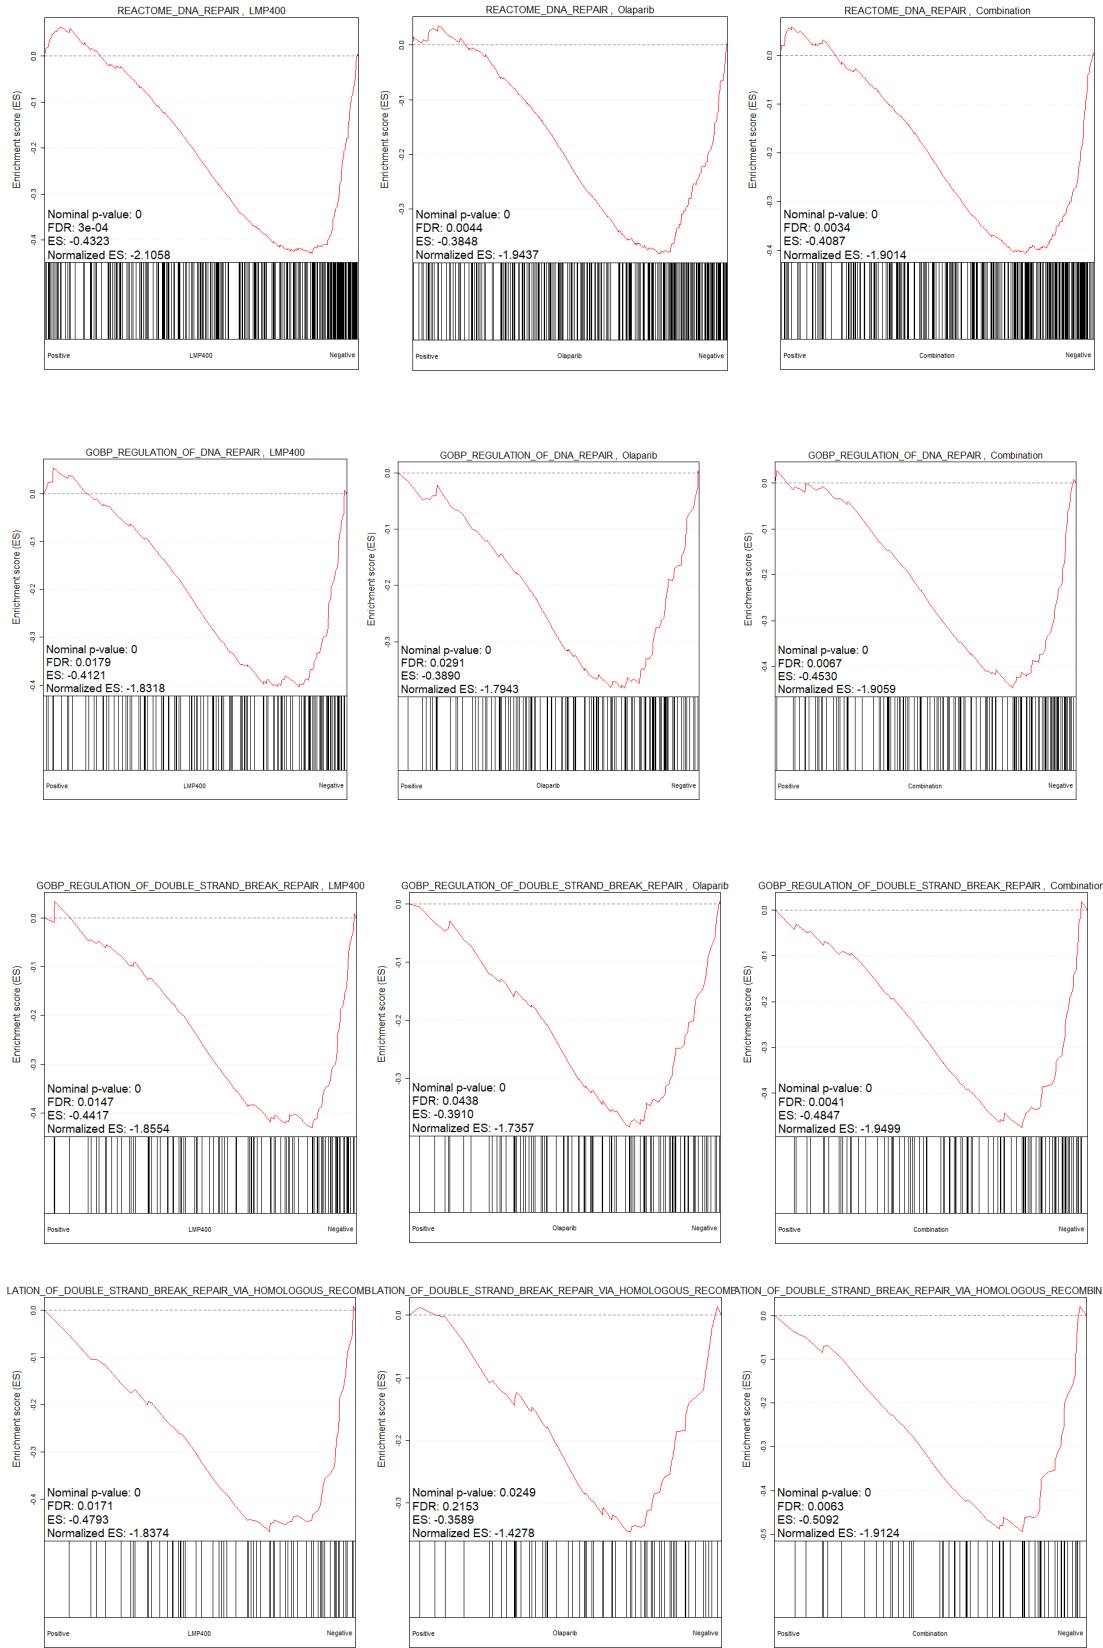

Figure S4 (continue)

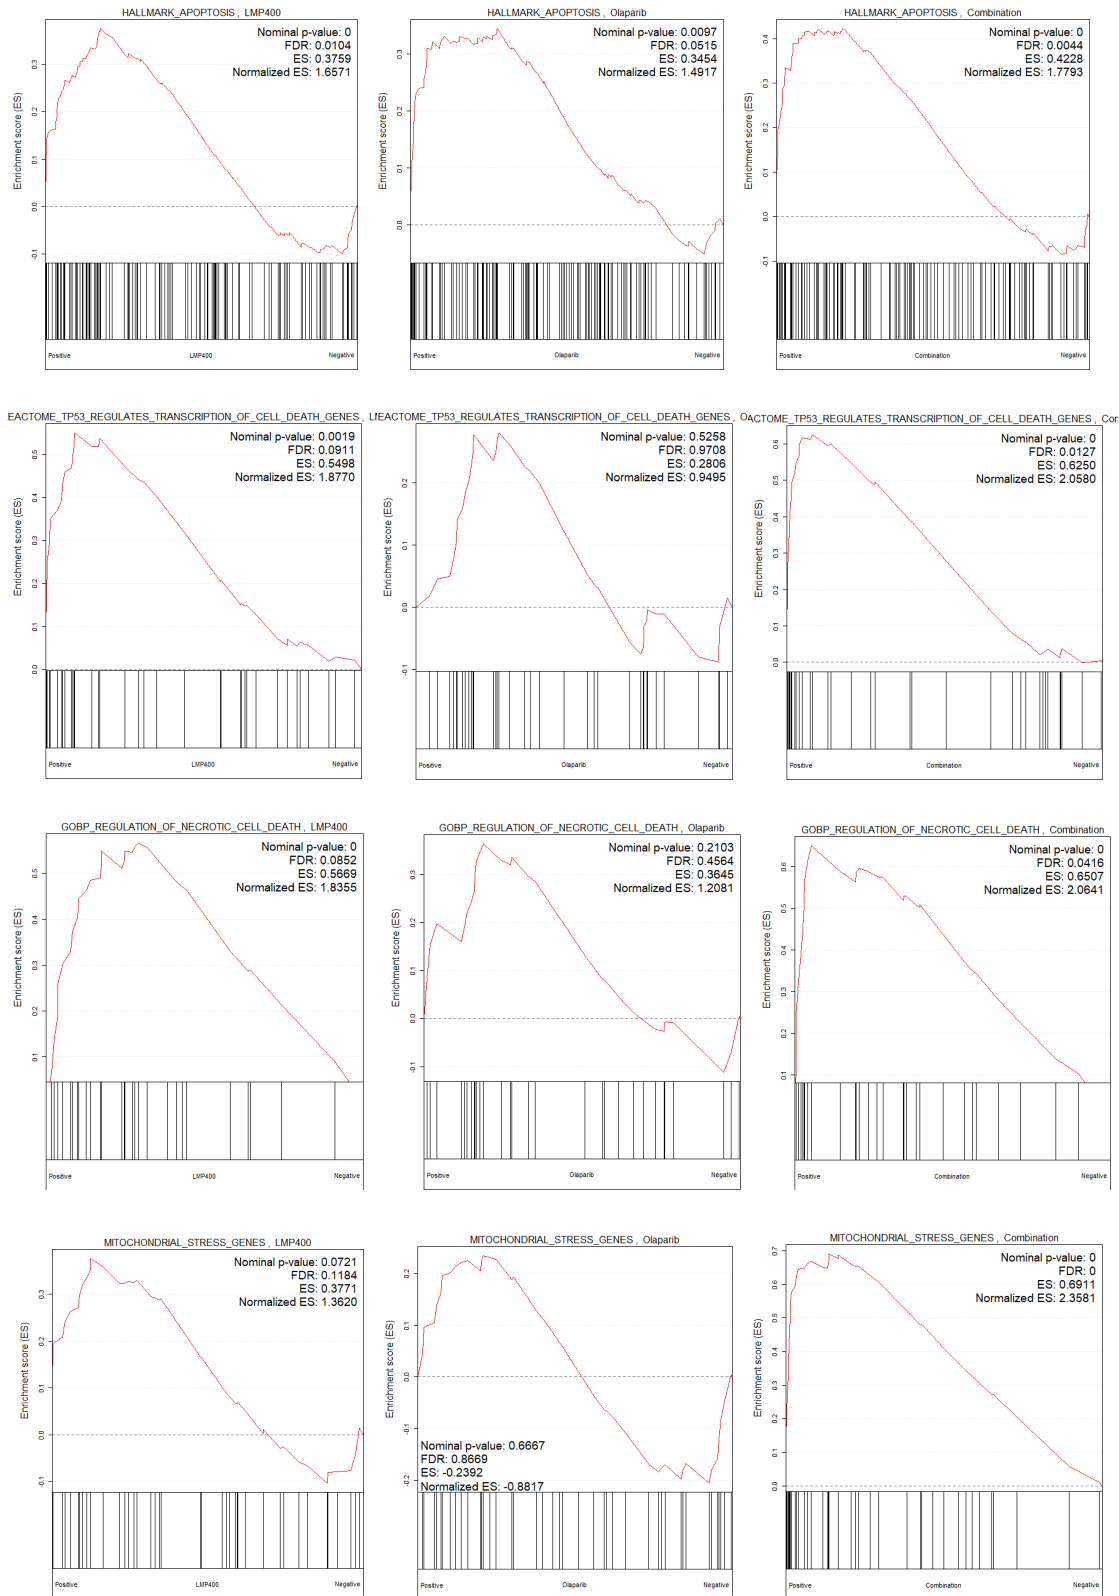

Figure S4 (continue)



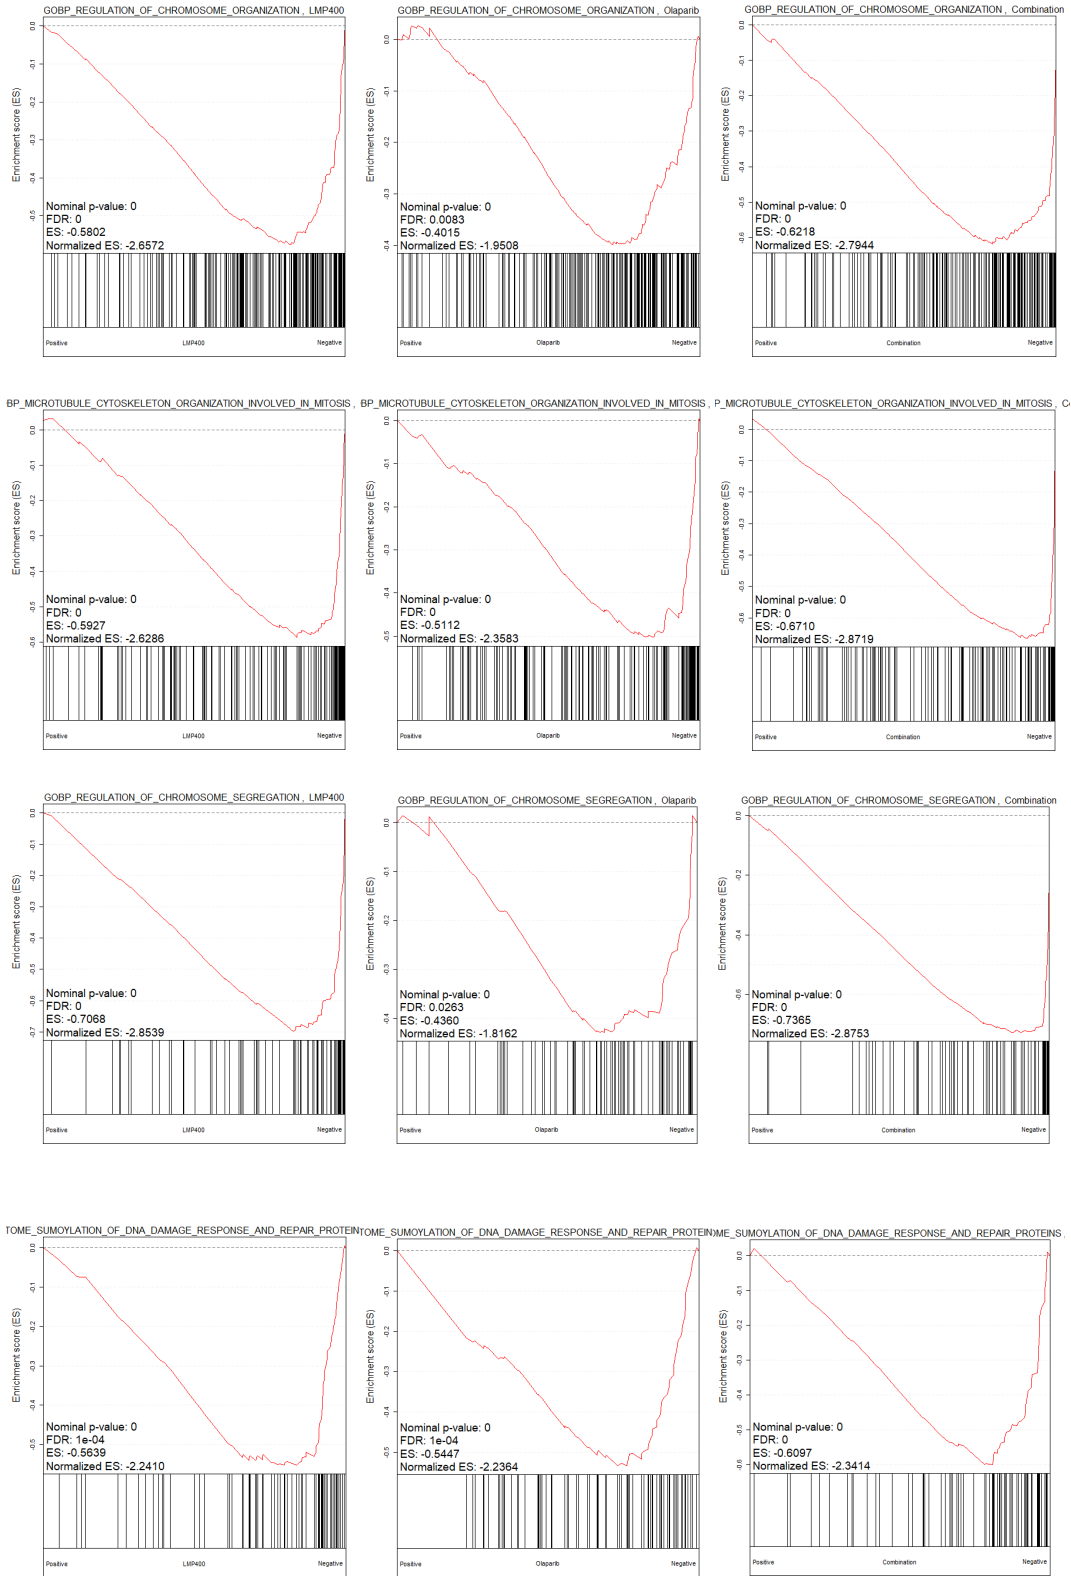

**Figure S4 (continue)**

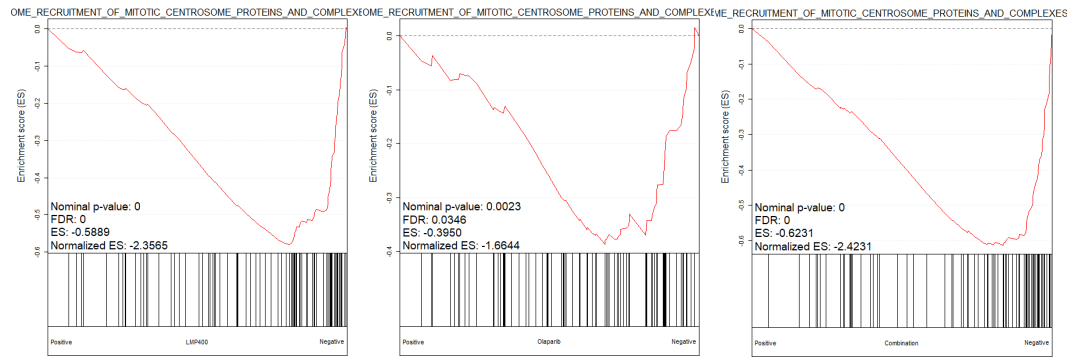

**Figure S4.** GSEA enrichments plots for individual dysregulated pathways per each treatment group. GSEA plots were made with the R package RToolBox.

**Figure S5**

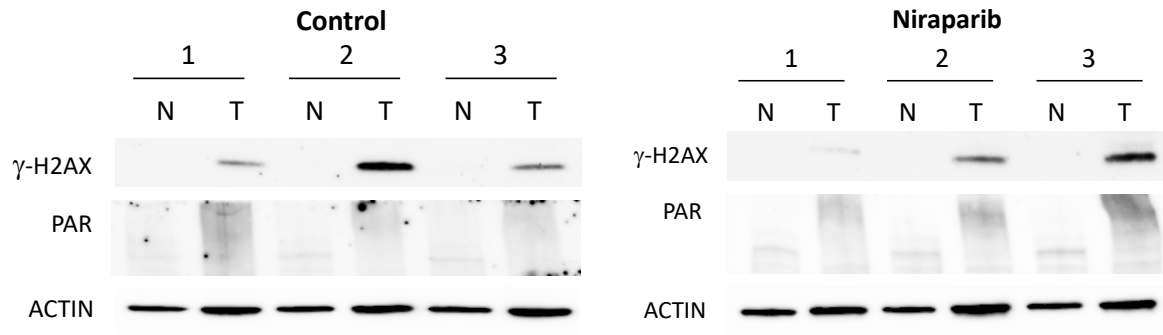

**Figure S5.** PD markers expression examined by Western blot analysis in mouse brain tumor and contralateral non-tumor tissues.

# Figure S6

A.

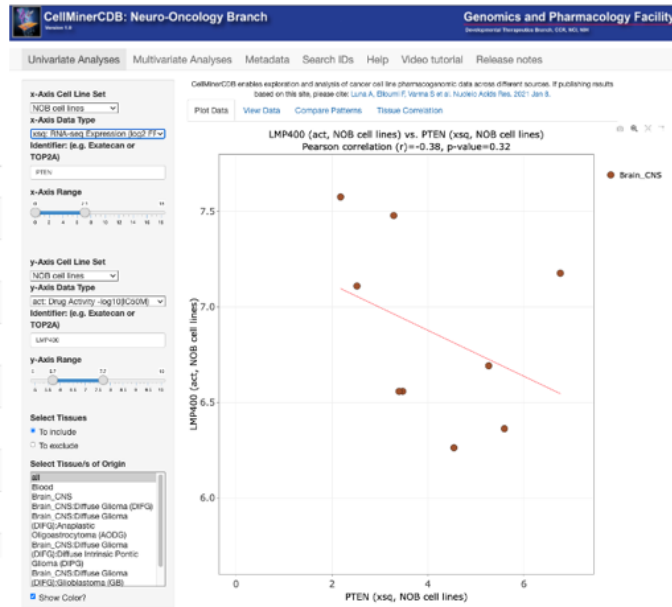

B.

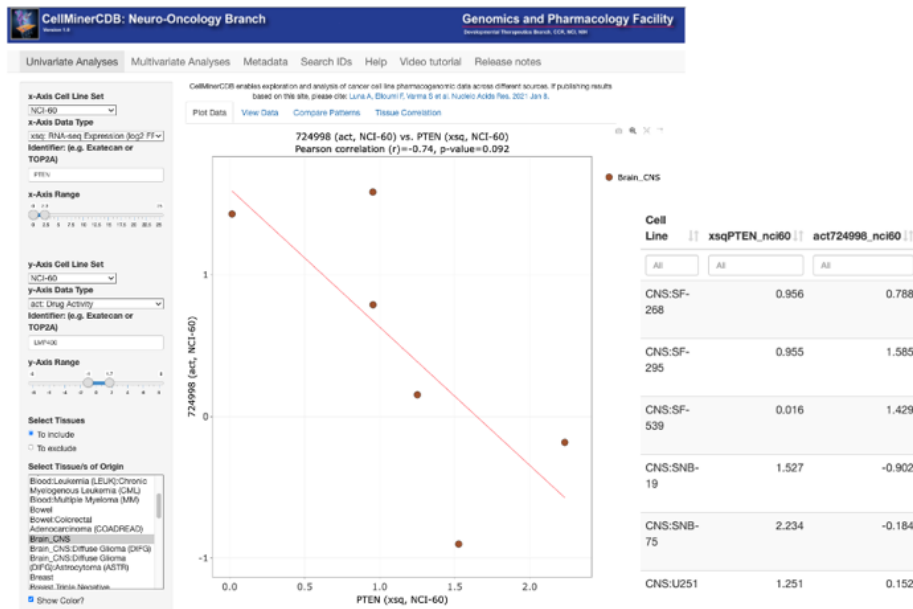

**Figure S6. LMP400 (Indotecan) is more active in GBM cells with low PTEN expression.**

Analysis of correlation between PTEN mRNA expression and LMP400 activity in NOB (A) and

NCI-60 (B) datasets through the CellMiner resource (<https://discover.nci.nih.gov/cellminer/>).

## Figure S7

A.

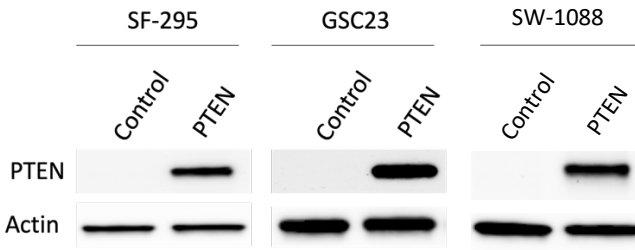

B.

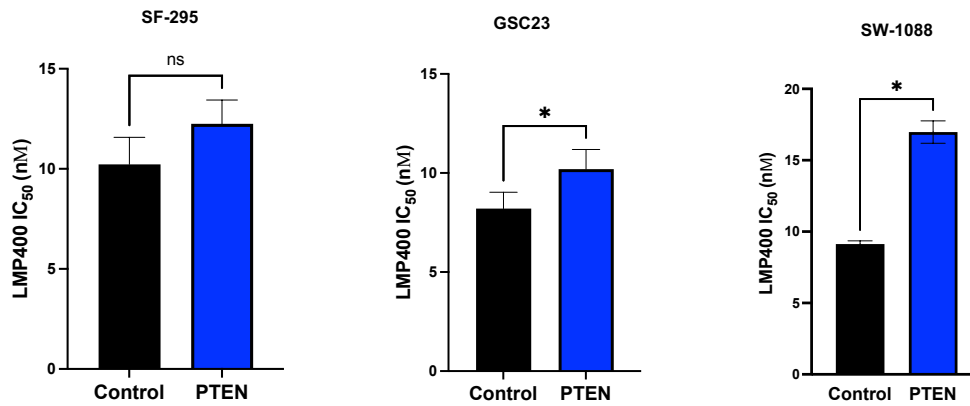

**Figure S7. A.** Western blot of PTEN expression rescued in SF-295, GSC23, and SW-1088 cells.

**B.** LMP400 IC<sub>50</sub> values in PTEN-expressing cells vs Control in SF-295, GSC23, and SW-1088

cells. A two-tailed *t* test was used to evaluate a difference between treated group and control.

\**p*<0.05.
